# Supplementary material for: Multihost Bartonella parasites display covert host specificity even when transmitted by generalist vectors
Source: PubMed Central journal article supplement (PMC5082552; doi:10.1111/1365-2656.12568), 2016-08-16

**Figure S1** Relationship between the proportion of positive samples per *Bartonella* species that were sequenced per host species per site, and the number of variants for that *Bartonella* species that were detected. Symbols are colour-coded by *Bartonella* species, with different symbol shapes for host species. A GLM revealed no significant association overall or within each host species or *Bartonella* species subset (see Appendix S1).

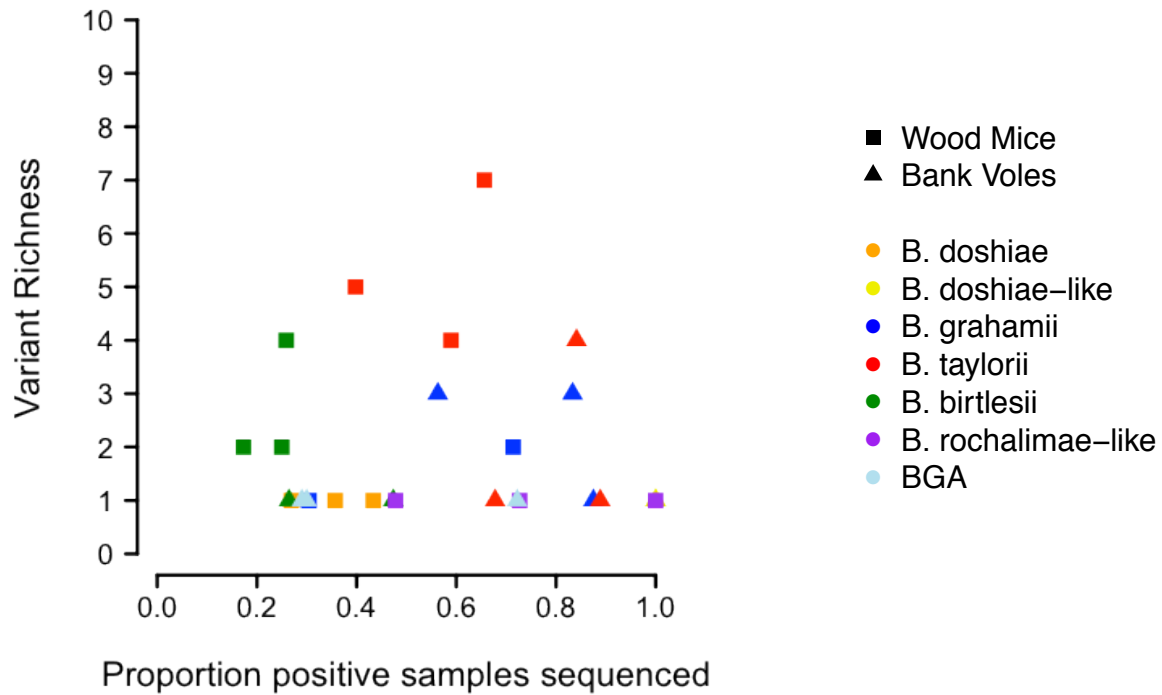

Supplement: JANE-85-1442-s002.pdf [file JANE-85-1442-s002.pdf]
