# Supplementary material for: Multihost Bartonella parasites display covert host specificity even when transmitted by generalist vectors
Source: PubMed Central journal article supplement (PMC5082552; doi:10.1111/1365-2656.12568), 2016-08-16
Supplement: JANE-85-1442-s005.pdf [file JANE-85-1442-s005.pdf]

**Table S1** The number of individual wood mice and bank voles captured and the number of blood samples collected from each species at each field site.

|            |                 | Manor Wood | Maresfield & Gordale | Rode Hall |
|------------|-----------------|------------|----------------------|-----------|
| Wood mice  | # blood samples | 587        | 496                  | 293       |
|            | # individuals   | 303        | 168                  | 272       |
| Bank voles | # blood samples | 615        | 311                  | 298       |
|            | # individuals   | 377        | 190                  | 184       |
