# Supplementary material for: Multihost Bartonella parasites display covert host specificity even when transmitted by generalist vectors
Source: PubMed Central journal article supplement (PMC5082552; doi:10.1111/1365-2656.12568), 2016-08-16
Supplement: JANE-85-1442-s014.pdf [file JANE-85-1442-s014.pdf]

**Table S10** Results of linear discriminant analyses that modelled host species identity based on the variant of *Bartonella* carried by fleas collected from them. Percentage successful prediction of host species is given for each model, where the model was first trained using 75% of real host-parasite associations (75:25 real) and then using 75% of randomised host-parasite associations (75:25 random). Mean percentage success of 1000 iterations is given, with 95% confidence intervals in brackets, and the success rates of models trained on the real data versus randomised data were compared using a Chi squared analysis. An LDA was performed using data on the *Bartonella* infections of all flea species combined and then using data on the *Bartonella* infections of *C. n. vulgaris* only. Analyses were not possible using data from other flea species independently as most variants were found <5 times in these other species and models could not be constructed with such a small amount of data (Table S8). Models were also constructed using a reduced data set that included only a single record of a *Bartonella* variant in fleas from a given host individual, even if multiple fleas harbouring the same *Bartonella* variant were collected from the same individual. *Bartonella* variants occurring in fleas fewer than 5 times in the data set were omitted from the analysis and this is indicated in the table if relevant.

| Data used                                                                                                                                                                       | Test         | % Prediction success   |
|---------------------------------------------------------------------------------------------------------------------------------------------------------------------------------|--------------|------------------------|
| All flea- <i>Bartonella</i><br>data, all flea species<br><i>n</i> = 333                                                                                                         | 75:25 real   | 85.3 (84.8 – 85.8)     |
|                                                                                                                                                                                 | 75:25 random | 49.8 (48.8 – 50.9)     |
|                                                                                                                                                                                 | $\chi^2$     | 28.7, <i>p</i> < 0.001 |
| Flea- <i>Bartonella</i><br>data without<br>pseudoreplication,<br>all flea species<br><i>n</i> = 287                                                                             | 75:25 real   | 83.6 (83.0 – 84.1)     |
|                                                                                                                                                                                 | 75:25 random | 50.5 (49.4 – 51.6)     |
|                                                                                                                                                                                 | $\chi^2$     | 24.8, <i>p</i> < 0.001 |
| All flea- <i>Bartonella</i><br>data, <i>C. n. vulgaris</i><br>only<br><i>n</i> = 189<br>Not including fleas<br>infected with variants<br>Type 08 or 10                          | 75:25 real   | 86.4 (85.8 – 87.0)     |
|                                                                                                                                                                                 | 75:25 random | 55.9 (54.4 – 57.3)     |
|                                                                                                                                                                                 | $\chi^2$     | 21.4, <i>p</i> < 0.001 |
| Flea- <i>Bartonella</i><br>data without<br>pseudoreplication,<br><i>C. n. vulgaris</i> only<br><i>n</i> = 174<br>Not including fleas<br>infected with variants<br>Type 08 or 10 | 75:25 real   | 84.8 (84.2 – 85.5)     |
|                                                                                                                                                                                 | 75:25 random | 57.5 (55.8 – 59.1)     |
|                                                                                                                                                                                 | $\chi^2$     | 18.2, <i>p</i> < 0.001 |
